# Supplementary material
Source: Springer Nature journal article supplement (https://www.springermedizin.de/resource/supplementary/12882_2013_928_MOESM1_ESM.pdf/9454140)
Supplement: MOESM1 [file 9454140]

21231 adults (age  $\geq 18$  years) commenced renal replacement therapy

Excluded

- 2170 indigenous
- 4 no postcode data
- 51 postcodes did not match remote area database

19006 non-indigenous adults categorised by remote area index

Excluded

- 11349 never treated with PD

7657 underwent PD at some stage and included in the study
